# Supplementary material for: Association between uncooperativeness and the glucose metabolism of patients with chronic behavioral disorders after severe traumatic brain injury: a cross-sectional retrospective study
Source: Biopsychosoc Med. 2018 Apr 23;12:6. doi: 10.1186/s13030-018-0125-0 (PMC5914015; doi:10.1186/s13030-018-0125-0)
Supplement: Supplementary file 5 — Table S3. Comparison of glucose uptake in patients who had severe traumatic brain injury, with or without non-verbal symptoms defined by the Brief Psychiatric Rating Scale classification system (Anxiety, Feelings of Guilt, Mannerisms and Posturing, Depressive Mood, Hostility, Hallucinatory Behavior, Motor Retardation, Blunted Affect, Excitement). Data are presented for the right hemisphere, left hemisphere, right thalamus, left thalamus, hemispheric LR ratio, and thalamic LR ratio. Glucose uptake is based on 18F-fluorodeoxyglucose positron emission tomography/computed tomography.*P < 0.05, CI, confidence interval; LR ratio, laterality ratio of SUVmax for the left and right regions; SD, standard deviation; sTBI, severe traumatic brain injury; SUVmax, maximum standardized uptake value; VOI, volume of interest. (XLSX 16 kb) [file 13030_2018_125_MOESM5_ESM.xlsx]

## Sheet: Sheet1
Demographic and clinical data	sTBI with behavioral disorder (n = 9)	sTBI without behavioral disorder (n = 5)	Statistical test
Anxiety, n (%)	1	0
Guilt feelings, n (%)	0	1
Mannerisms and posturing, n (%)	3	0
Depressive mood, n (%)	2	0
Hostility, n (%)	2	0
Hallucinatory behavior, n (%)	1	0
Motor retardation, n (%)	1	0
Uncooperativeness, n (%)	5	1
Unusual thought content, n (%)	1	0
Blunted affect, n (%)	2	0
Excitement, n (%)	7	1	p = 0.09
Disorientation, n (%)	1	0	p = 1
Fischer exact T test

## Sheet: Sheet3
Symptoms of behavioral disorders	Whole brain SUVmax ± SE (95% CI)	P	Right hemisphere ± SE (95% CI)	P	Left hemisphere ± SE (95% CI)	P	L/R hemisphere ratio ± SE (95% CI)	P	Right thalamus ± SE (95% CI)	P	Left thalamus ± SE (95% CI)	P	L/R thalamus ratio ± SE (95% CI)	P
Anxiety		0.5		0.48		0.63		0.42		0.87		0.89		0.91
YES, n=1	9.51 ± 3.29 (2.36 - 16.66)		9.27 ± 4.21 (0.1 - 18.44)		9.26 ± 3.96 (0.63 - 17.89)		1.0 ± 0.1 (0.79 - 1.21)		7.02 ± 2.26 (2.1 - 11.94)		6.37 ± 2.55 (0.82 - 11.92)		0.91 ± 0.32 (0.2 - 1.61)
NO, n = 13	11.87 ± 0.91 (9.89 - 13.86)		12.43 ± 1.17 (9.89 - 14.98)		11.28 ± 1.1 (8.89 - 13.68)		0.91 ± 0.03 (0.86 - 0.97)		7.42 ± 0.63 (6.05 - 8.78)		6.76 ± 0.71 (5.22 - 8.3)		0.95 ± 0.09 (0.75 - 1.14)
Guilt feelings		0.52		0.39		0.57		0.45		0.14		0.96		0.31
YES, n= 1	13.81 ± 3.29 (6.65 - 20.98 )		15.8 ± 4.16 (6.73 - 24.87)		13.37 ± 3.94 (4.78 - 21.96)		0.85 ± 0.1 (0.63 - 1.06)		10.55 ± 2.05 (6.07 - 15.03 )		6.6 ± 2.55 (1.05 - 12.15 )		0.63 ± 0.31 (-0.05 - 1.3)
NO, n = 13	11.54 ± 0.91 (9.56 - 13.53 )		11.93 ± 1.15 (9.42 - 14.45)		10.97 ± 1.09 (8.58 - 13.35)		0.93 ± 0.03 (0.87 - 0.99)		7.15 ± 0.57 (5.9 - 8.39)		6.74 ± 0.71 (5.2 - 8,28)		0.97 ± 0.09 (0.78 - 1.16)
Mannerisms and posturing		0.25		0.24		0.33		0.46		0.12		0.34		0.78
YES, n= 3	9.75 ± 1.83 (5.77 -13.72 )		9.63 ± 2.34 (4.54 - 14.73 )		9.14 ± 2.22 (4.31 - 13.97)		0.96 ± 0.06 (0.84 - 1.08 )		5.63 ± 1.17 (3.07 -8.19 )		5.48 ± 1.41 (2.4 -8.56 )		0.99 ± 0.19 (0.59 - 1.4)
NO, n = 11	12.24 ± 0.95 (10.16 - 14.32 )		12.91 ± 1.22 (10.25 - 15.57 )		11.68 ± 1.16 (9.16 - 14.21 )		0.91 ± 0.03 (0.84 - 1.08 )		7.87 ± 0.61 (6.53 -9.2 )		7.07 ± 0.74 (5.46 - 8.68 )		0.93 ± 0.1 (0.72 - 1.14)
Depressive mood		0.55		0.8		0.82		0.9		0.63		0.78		0.47
YES, n= 2	13.05 ± 2.33 (7.97 -18.12 )		12.93 ± 3.03 (6.32 -19.53 )		11.75 ± 2.82 (5.6 -17.9 )		0.93 ± 0.07 (0.77 - 1.08)		8.11 ± 1.58 (4.65 -11.56 )		6.26 ±1.8 (2.35 -10.17 )		0.79 ± 0.22 (0.3 -1.27)
NO, n = 12	11.48 ± 0.95 (9.41 -13.55 )		12.09 ± 1.24 (9.39 -14.79 )		11.04 ± 1.15 (8.53 -13.55 )		0.92 ± 0.03 (0.86 -0.98 )		7.27 ± 0.65 (5.86 -8.68 )		6.81 ±0.73 (5.21 -8.4 )		0.97 ± 0.09 (0.77 -1.17)
Hostility		0.17		0.19		0.17		0.87		0.44		0.08		0.22
YES, n= 2	8.73 ± 2.18 (3.98 -13.48 )		8.56 ± 2.82 (2.42 -14.7)		7.61 ± 2.61 (1.93 -13.28 )		0.91 ± 0.07 (0.75 -1.06 )		6.23 ± 1.56 (2.83 -9.63 )		3.96 ± 1.58 (0.51 -7.4)		0.68 ± 0.21 (0.22 - 1.15)
NO, n = 12	12.2 ± 0.89 (10.26 -14.14 )		12.82 ± 1.15 (10.31 -15.33 )		11.73 ± 1.06 (9.41 -14.05 )		0.92 ± 0.03 (0.86 - 0.99 )		7.58 ± 0.64 (6.2 -8.97 )		7.19 ± 0.64 (5.79 -8.6)		0.99 ± 0.09 (0.8 -1.18)
Hallucinatory behavior		0.48		0.48		0.63		0.42		0.87		0.89		0.91
YES, n= 1	9.51 ± 3.28 (2.36 -16.66 )		9.27 ± 4.21 (0.1 -18.44 )		9.26 ± 3.96 (0.63 -17.89 )		0.1 ± 0.1 (0.79 - 1.21)		7.02 ± 2.26 (2.1 - 11.94)		6.37 ± 2.55 (0.82 - 11.91)		0.91 ± 0.32 (0.2 - 1.61)
NO, n = 13	11.87 ± 0.91 (9.89 -13.86 )		12.43 ± 1.17 (9.89 -14.98 )		11.28 ± 1.1 (8.89 -13.68 )		0.91 ± 0.03 (0.86 - 0.97)		7.42 ± 0.63 (6.05 - 8.78)		6.76 ± 0.71 (5.22 - 8.3)		0.95 ± 0.09 (0.75 - 1.14)
Motor retardation		0.46		0.65		0.66		0.92		0.06		0.16		0.86
YES, n= 1	14.1 ± 3.27 (6.97 - 21.23)		14.1 ± 4.26 (4.81 - 23.39)		12.84 ± 3.97 (4.19 - 21.49)		0.91 ± 0.1 (0.69 - 1.13)		11.32 ± 1.93 (7.11 - 15.53)		10.07 ± 2.34 (4.97 - 15.17)		0.89 ± 0.32 (0.18 - 1.59)
NO, n = 13	11.52 ± 0.91 (9.54 - 13.5)		12.06 ± 1.18 (9.49 - 14.64)		11.01 ± 1.1 (8.61 - 13.41)		0.92 ± 0.03 (0.86 - 0.98)		7.09 ± 0.54 (5.92 - 8.25)		6.47 ± 0.65 (5.06 - 7.89)		0.95 ± 0.09 (0.75 - 1.14)
Uncooperativeness		0.82		0.98		0.84		0.73		0.23		0.38		0.04*
YES, n= 6	11.94 ± 1.36 (8.97 - 14.91)		12.17 ± 1.76 (8.35 - 16)		10.89 ± 1.63 (7.33 - 14.44)		0.91 ± 0.04 (0.82 - 0.1)		8.23 ± 0.87 (6.34 - 10.11)		6.04 ± 1.01 (3.85 - 8.23)		0.74 ± 0.11 (0.51 - 0.99)
NO, n = 8	11.52 ± 1.18 (8.95 - 14.1)		12.23 ± 1.52 (8.92 - 15.55)		11.33 ± 1.41 (8.25 - 14.41)		0.93 ± 0.04 (0.85 - 1.01)		6.76 ± 0.75 (5.13 - 8.4)		7.24 ± 0.87 (5.35 - 9.15)		1.09 ± 0.1 (0.88 - 1.3)
Unusual thought content		0.05*		0.01*		0.001*		0.58		0.94		0.03*		0.04*
YES, n= 1	17.75 ± 2.82 (11.61 - 23.89)		22.02 ± 3.14 (15.18 - 28.86)		21.48 ± 2.53 (15.96 - 27)		0.98 ± 0.1 (0.76 - 1.19)		7.55 ± 2.26 (2.62 - 12.48)		11.74 ± 2.06 (7.25 - 16.22)		1.55 ± 0.27 (0.97 - 2.13)
NO, n = 13	11.24 ± 0.78 (9.54 - 12.94)		11.45 ± 0.87 (9.56 - 13.35)		10.34 ± 0.7 (8.82 - 11.88)		0.92 ± 0.03 (0.86 - 0.98)		7.38 ± 0.63 (6.01 - 8.74)		6.35 ± 0.57 (5.1 - 7.59)		0.9 ± 0.07 (0.73 - 1.06)
Blunted affect		0.93		0.88		0.97		0.48		0.42		0.53		0.9
YES, n= 2	11.9 ± 2.37 (6.74 - 17.06)		11.77 ± 3.04 (5.15 - 18.38)		11.25 ± 2.83 (5.09 - 17.41)		0.96 ± 0.07 (0.82 - 1.12)		8.58 ± 1.56 (5.19 - 11/97)		7.8 ± 1.77 (3.94 - 11.65)		0.92 ± 0.23 (0.42 - 1.42)
NO, n = 12	11.67 ± 0.97 (9.57 - 13.78)		12.28 ± 1.24 (9.58 - 14.98)		11.12 ± 1.15 (8.61 - 13.64)		0.91 ± 0.03 (0.85 - 0.97)		7.19 ± 0.64 (5.81 - 8.58)		6.55 ± 0.72 (4.98 - 8.13)		0.95 ± 0.09 (0.74 - 1.15)
Excitement		0.34		0.35		0.37		0.83		0.72		0.73		0.53
YES, n= 8	12.44 ± 1.14 (9.96 - 14.92)		13.15 ± 1.46 (9.96 - 16.34)		12 ± 1.37 (9 - 14.95)		0.92 ± 0.04 (0.84 - 0.99)		7.58 ± 0.8 (5,85 - 9.32)		6.52 ± 0.9 (4.57 - 8.48)		0.9 ± 0.11 (0.65 - 1.14)
NO, n = 6	10.72 ± 1.31 (7.86 - 13.58)		10.96 ± 1.69 (7.28 - 14.64)		10.02 ± 1.58 (6.59 - 13.46)		0.93 ± 0.04 (0.84 - 1.02)		7.13 ± 0.92 (5.13 - 9.13)		7.01 ± 1.03 (4.75 - 9.26)		1.01 ± 0.13 (0.72 - 1.29)
Disorientation		0.05*		0.01*		0.001*		0.58		0.94		0.03*		0.04*
YES, n= 1	17.75 ± 2.82 (11.61 - 23.89)		22.02 ± 3.14 (15.18 - 28.86)		21.48 ± 2.53 (15.96 - 27)		0.98 ± 0.01 (0.76 - 1.19)		7.55 ± 2.26 (2.62 - 12.48)		11.74 ± 2.06 (7,25 - 16.22)		1.55 ± 0.27 (0.97 - 2.13)
NO, n = 13	11.24 ± 0.78 (9.54 - 12.94)		11.45 ± 0.87 (9.56 - 13.35)		10.34 ± 0.7 (8.82 - 11.88)		0.92 ± 0.03 (0.86 - 0.98)		7,38 ± 0.63 (6.01 - 8,74)		6,35 ± 0.57 (5.1 - 7.59)		0.89 ± 0.07 (0.74 - 1.06)
